# Supplementary material
Source: PubMed Central journal article supplement (PMC6336103)
Supplement: NIHMS997307-supplement-Supplement.pdf [file NIHMS997307-supplement-Supplement.pdf]

## Supplementary Online Content

Alzahrani Z, Ornelas-Loredo A, Darbar SD, et al. Association Between Family History and Early-Onset Atrial Fibrillation Across Racial and Ethnic Groups. *JAMA Netw Open*. 2018;1(5):e182497.  
doi:10.1001/jamanetworkopen.2018.2497

**eTable.** Baseline Characteristics of Patients With EOAF and Non-EOAF Based on a Reported History of AF in First-Degree Relatives

This supplementary material has been provided by the authors to give readers additional information about their work.

**eTable. Baseline characteristics of patients with EOAF and non-EOAF based on a reported history of AF in first-degree relatives.**

|                          | First degree relative with AF |           |         |                            |            |         |
|--------------------------|-------------------------------|-----------|---------|----------------------------|------------|---------|
|                          | Early-onset AF (n=74)         |           | P-value | Non-early-onset AF (n=590) |            | P-value |
| Family History           | Yes (n=36)                    | No (n=38) |         | Yes (n=128)                | No (n=462) |         |
| Age of onset (yrs.)      | 46±11                         | 51±10     | 0.06    | 62±10                      | 64±11      | 0.13    |
| Male, n (%)              | 21 (58)                       | 23 (61)   | 0.85    | 67 (52)                    | 296 (62)   | 0.02    |
| Ethnicity                |                               |           | 0.46    |                            |            | <.001   |
| European American, n (%) | 22 (61)                       | 21 (55)   |         | 66 (52)                    | 158 (34)   |         |
| African American, n (%)  | 8 (22)                        | 13 (34)   |         | 44 (34)                    | 193(42)    |         |
| Hispanic/Latino, n (%)   | 6 (17)                        | 4 (10)    |         | 18 (14)                    | 111(24)    |         |
| BMI                      | 35±8.4                        | 31±8.0    | 0.03    | 34±7.9                     | 33±8.6     | 0.15    |
| HTN, n (%)               | 13 (36)                       | 13 (34)   | 0.86    | 109 (85)                   | 396 (86)   | 0.87    |
| CAD, n (%)               | 0                             | 0         | 1.00    | 89 (64)                    | 296 (64)   | 0.25    |
| DM, n (%)                | 0                             | 0         | 1.00    | 41 (32)                    | 169 (37)   | 0.34    |
| LVEF (%)                 | 57±11                         | 56±11     | 0.54    | 52±14                      | 49±15      | 0.11    |
| CHF, n (%)               | 0                             | 0         | 1.00    | 42 (33)                    | 170 (37)   | 0.41    |

AF, atrial fibrillation; EO, early-onset; BMI, body mass index; DM, diabetes mellitus; LVEF, left ventricular ejection fraction; CAD, coronary artery disease; CHF, congestive heart failure; HTN, hypertension; OSA, obstructive sleep apnea; SHD, structural heart disease. Mean (SD).
